# Supplementary material
Source: HighWire-hosted journal article supplement (doi:10.1101/rna.041814.113)
Supplement: SuppLegends.docx [file SuppLegends.docx]

**SUPPLEMENTARY DATA**

Supplementary Data available Online: ***Supplementary Figures 1 to 8*** and ***Supplementary Tables 1 and 2***.

Supp. Fig. 1 Confirmation of hypoxia induction in MCF7 cells.

Supp. Fig. 2a Confirmation of Drosha knockdown.

Supp. Fig. 2b Schematic representation of conventional strategy of pri-miRNA quantitation by PCR.

Supp. Fig. 2c Schematic representation of novel strategy of pri-miRNA quantitation by RT-PCR.

Supp. Fig. 2d Confirmation of Drosha knockdown at the functional level.

Supp. Fig. 2e Schematic representation of primer design for 5’ RACE of miRs 106b, 93 & 25.

Supp.Fig. 2f Schematic representation of primer design for 3’ RACE of miRs 106b, 93 & 25.

Supp. Fig. 2g Sequence of PRI 106b/93 and its ORF analysis.

Supp. Fig. 2h Sequence of PRI 24 and its ORF analysis.

Supp. Fig. 2i Expression of PRI 24 in MCF7 & HeLa cells.

Supp. Fig. 2j Screening for the alternatively spliced mRNAs of AP-O which might encode miR 24-1.

Supp. Fig. 2k Screening for alternatively spliced mRNAs of MCM7 which might encode miR 25.

Supp Fig 3a PCR performed with MCM EXON FWD & miRNA 5 RACE primers with DNA as template.

Supp. Fig. 3b Sequence of ALT SPLICE 25 and its ORF analysis.

Supp. Fig. 3c Sequence of ALT SPLICE 93 and its ORF analysis.

Supp. Fig. 3d Expression of host genes after Drosha knockdown.

Supp. Fig. 3e Confirmation of alternatively spliced pri-miRNAs by RT-PCR with Exon Junction Spanning primers.

Supp. Fig. 3f Accumulation of ALT SPLICE 25, ALT SPLICE 93 and PRI 24 upon Drosha knockdown.

Supp Fig 4 Schematic representation of splice acceptor signals upstream of intronic miRNAs predicted by SplicePort .

Supp. Fig. 4a Splice acceptor signals upstream of human intronic miRNAs miR 106b-93-25.

Supp. Fig. 4b Splice acceptor signals upstream of mouse intronic miRNAs miR 106b-93-25.

Supp. Fig. 4c Splice acceptor signals upstream of human intronic miRNAs miR 23b-27b-24-1.

Supp. Fig. 4d Splice acceptor signals upstream of mouse intronic miRNAs miR 23b-27b-24-1.

Supp. Fig. 5 Splice acceptor signals predicted upstream of intronic miRNAs miR 126, 330 and 26b.

Supp. Fig.6 ESTs supporting the usage of predicted splice acceptor signals upstream of intronic miRNAs.

Supp. Fig. 6a EST corresponding to human intronic miRNA miR 126.

Supp. Fig. 6b EST corresponding to mouse intronic miRNA miR 27b.

Supp. Fig. 6c EST corresponding to mouse intronic miRNA miR 24-1.

Supp. Fig. 7a Overexpression of alternatively spliced pri-miRNAs after transfection of CMV promoter driven miRNA mini-genes.

Supp. Fig. 7b Overexpression of alternatively spliced pri-miRNAs by RT-PCR.

Supp. Fig. 7c Confirmation of Spliceosome knockdown.

Supp. Fig. 7d Site directed mutagenesis of splice acceptor signal upstream of miR 25.

Supp. Fig. 8a HIF-1α binding sites 5 kb upstream of PRI 24.

Supp. Fig. 8b HIF-1α binding sites 5 kb upstream of PRI 106b/93.

Supp. Fig. 8c List of full length pri-miRNAs corresponding to human miRNAs identified till date.

Supp. Table 1. List of primer sequences.

Supp. Table 2. List of siRNA sequences.
